# Supplementary material for: Symptom Profiles of Children and Young People 12 Months after SARS-CoV-2 Testing: A National Matched Cohort Study (The CLoCk Study)
Source: MDPI journal article supplement (doi:10.3390/children10071227), 2023-07-14
Supplement: s1 [file s1]

**Supplementary Table S1.** Characteristics at baseline of CYP by SARS-CoV-2 and vaccination status<sup>a</sup> by 12 months.

|                             | <b>Initial-negatives (NN)</b><br>(N=7,474) |                               | <b>Negative &amp; infected (NP)</b><br>(N=3,948) |                               | <b>Initial-positives (PN)</b><br>(N= 8,060) |                               | <b>Positive &amp; reinfected (PP)</b><br>(N= 684) |                               |
|-----------------------------|--------------------------------------------|-------------------------------|--------------------------------------------------|-------------------------------|---------------------------------------------|-------------------------------|---------------------------------------------------|-------------------------------|
|                             | <b>Vaccine: No<br/>n (%)</b>               | <b>Vaccine: Yes<br/>n (%)</b> | <b>Vaccine: No<br/>n (%)</b>                     | <b>Vaccine: Yes<br/>n (%)</b> | <b>Vaccine: No<br/>n (%)</b>                | <b>Vaccine: Yes<br/>n (%)</b> | <b>Vaccine: No<br/>n (%)</b>                      | <b>Vaccine: Yes<br/>n (%)</b> |
| <b>Response Rate</b>        | 1,535 (20.6%)                              | 5,928 (79.4%)                 | 1,310 (33.3%)                                    | 2,628 (66.7%)                 | 1,930 (24.0%)                               | 6,113 (76.0%)                 | 257 (37.6%)                                       | 427 (62.4%)                   |
| <b>Sex</b>                  |                                            |                               |                                                  |                               |                                             |                               |                                                   |                               |
| Male                        | 644 (22.8%)                                | 2,182 (77.2%)                 | 516 (34.9%)                                      | 962 (65.1%)                   | 794 (26.2%)                                 | 2,233 (73.8%)                 | 118 (44.7%)                                       | 146 (55.3%)                   |
| Female                      | 891 (19.2%)                                | 3,746 (80.8%)                 | 794 (32.3%)                                      | 1,666 (67.7%)                 | 1,136 (22.7%)                               | 3,880 (77.4%)                 | 139 (33.1%)                                       | 281 (66.9%)                   |
| <b>Age (years)</b>          |                                            |                               |                                                  |                               |                                             |                               |                                                   |                               |
| 11-14                       | 1,057 (30.4%)                              | 2,417 (69.6%)                 | 998 (44.0%)                                      | 1,268 (56.0%)                 | 1,310 (33.8%)                               | 2,570 (66.2%)                 | 184 (49.9%)                                       | 185 (50.1%)                   |
| 15-17                       | 478 (12.0%)                                | 3,511 (88.0%)                 | 312 (18.7%)                                      | 1,360 (81.3%)                 | 620 (14.9%)                                 | 3,543 (85.1%)                 | 73 (23.2%)                                        | 242 (76.8%)                   |
| <b>Ethnicity</b>            |                                            |                               |                                                  |                               |                                             |                               |                                                   |                               |
| White                       | 974 (17.7%)                                | 4,545 (82.3%)                 | 1,021 (32.6%)                                    | 2,111 (67.4%)                 | 1,275 (21.3%)                               | 4,715 (78.7%)                 | 180 (34.0%)                                       | 349 (66.0%)                   |
| Asian or Asian British      | 325 (28.4%)                                | 818 (71.6%)                   | 148 (35.2%)                                      | 272 (64.8%)                   | 365 (29.7%)                                 | 865 (70.3%)                   | 41 (45.6%)                                        | 49 (54.4%)                    |
| Mixed                       | 109 (25.9%)                                | 313 (74.1%)                   | 74 (33.0%)                                       | 150 (67.0%)                   | 120 (28.4%)                                 | 302 (71.6%)                   | 15 (44.1%)                                        | 19 (55.9%)                    |
| Black, African or Caribbean | 85 (34.8%)                                 | 159 (65.2%)                   | 42 (46.2%)                                       | 49 (53.9%)                    | 109 (49.1%)                                 | 113 (50.9%)                   | 11 (57.9%)                                        | 8 (42.1%)                     |
| Other                       | 25 (26.6%)                                 | 69 (73.4%)                    | 20 (33.9%)                                       | 39 (66.1%)                    | 40 (28.6%)                                  | 100 (71.4%)                   | 6 (85.7%)                                         | 1 (14.3%)                     |
| Prefer not to say           | 17 (40.5%)                                 | 25 (59.5%)                    | 5 (41.7%)                                        | 7 (58.3%)                     | 21 (53.9%)                                  | 18 (46.2%)                    | 4 (80.0%)                                         | 1 (20.0%)                     |
| <b>Region</b>               |                                            |                               |                                                  |                               |                                             |                               |                                                   |                               |
| East Midlands               | 77 (19.3%)                                 | 323 (80.8%)                   | 60 (29.1%)                                       | 146 (70.9%)                   | 102 (19.7%)                                 | 416 (80.3%)                   | 16 (29.6%)                                        | 38 (70.4%)                    |
| East of England             | 293 (15.4%)                                | 1,611 (84.6%)                 | 357 (29.1%)                                      | 872 (71.0%)                   | 306 (19.8%)                                 | 1,242 (80.2%)                 | 41 (32.3%)                                        | 86 (67.7%)                    |
|                             | <b>Initial-negatives</b><br>(N=7,474)      |                               | <b>Negative &amp; infected</b><br>(N=3,948)      |                               | <b>Initial-positives</b><br>(N= 8,060)      |                               | <b>Positive &amp; reinfected</b><br>(N= 684)      |                               |
|                             | <b>Vaccine: No<br/>n (%)</b>               | <b>Vaccine: Yes<br/>n (%)</b> | <b>Vaccine: No<br/>n (%)</b>                     | <b>Vaccine: Yes<br/>n (%)</b> | <b>Vaccine: No<br/>n (%)</b>                | <b>Vaccine: Yes<br/>n (%)</b> | <b>Vaccine: No<br/>n (%)</b>                      | <b>Vaccine: Yes<br/>n (%)</b> |
| <b>Response Rate</b>        | 1,535 (20.6%)                              | 5,928 (79.4%)                 | 1,310 (33.3%)                                    | 2,628 (66.7%)                 | 1,930 (24.0%)                               | 6,113 (76.0%)                 | 257 (37.6%)                                       | 427 (62.4%)                   |

| <b>Region</b>            |             |               |             |             |             |               |            |             |  |
|--------------------------|-------------|---------------|-------------|-------------|-------------|---------------|------------|-------------|--|
| London                   | 378 (20.6%) | 1,453 (79.4%) | 293 (35.3%) | 536 (64.7%) | 444 (25.0%) | 1,331 (75.0%) | 70 (43.5%) | 91 (56.5%)  |  |
| North East               | 52 (26.3%)  | 146 (73.7%)   | 33 (39.3%)  | 51 (60.7%)  | 75 (26.4%)  | 209 (73.6%)   | 8 (28.6%)  | 20 (71.4%)  |  |
| North West               | 258 (36.8%) | 443 (63.2%)   | 145 (48.5%) | 154 (51.5%) | 285 (32.7%) | 587 (67.3%)   | 30 (44.8%) | 37 (55.2%)  |  |
| South East               | 160 (12.9%) | 1,076 (87.1%) | 229 (31.4%) | 500 (68.6%) | 257 (18.0%) | 1,172 (82.0%) | 32 (32.0%) | 68 (68.0%)  |  |
| South West               | 44 (18.3%)  | 196 (81.7%)   | 36 (27.9%)  | 93 (72.1%)  | 78 (22.0%)  | 277 (78.0%)   | 12 (27.3%) | 32 (72.7%)  |  |
| West Midlands            | 157 (26.3%) | 441 (73.8%)   | 85 (32.7%)  | 175 (67.3%) | 199 (27.1%) | 535 (72.9%)   | 30 (52.6%) | 27 (47.4%)  |  |
| Yorkshire and the Humber | 116 (32.7%) | 239 (67.3%)   | 72 (41.6%)  | 101 (58.4%) | 184 (34.9%) | 344 (65.2%)   | 18 (39.1%) | 28 (60.9%)  |  |
| <b>IMD quintile</b>      |             |               |             |             |             |               |            |             |  |
| 1 (most deprived)        | 426 (38.0%) | 694 (62.0%)   | 218 (45.1%) | 265 (54.9%) | 457 (38.8%) | 722 (61.2%)   | 54 (45.8%) | 64 (54.2%)  |  |
| 2                        | 308 (23.6%) | 995 (76.4%)   | 242 (37.9%) | 397 (62.1%) | 410 (28.7%) | 1,021 (71.4%) | 54 (43.9%) | 69 (56.1%)  |  |
| 3                        | 267 (18.6%) | 1,166 (81.4%) | 243 (32.9%) | 496 (67.1%) | 339 (22.6%) | 1,161 (77.4%) | 45 (33.6%) | 89 (66.4%)  |  |
| 4                        | 278 (16.3%) | 1,433 (83.8%) | 273 (30.2%) | 631 (69.8%) | 372 (20.9%) | 1,408 (79.1%) | 52 (36.6%) | 90 (63.4%)  |  |
| 5 (least deprived)       | 256 (13.5%) | 1,640 (86.5%) | 334 (28.5%) | 839 (71.5%) | 352 (16.4%) | 1,801 (83.7%) | 52 (31.1%) | 115 (68.9%) |  |

<sup>a</sup>Those who did not respond to the vaccine question (n=38) were excluded.

**Supplementary Table S2.** Reported symptoms N(%), and self-rated health<sup>a</sup>, by SARS-CoV-2 status, at time of index test and 12 months post-test.

|                                         | <i>At time of index test<sup>b</sup></i> |                                     |                                   |                                      | Initial-negatives (NN)<br>n = 7,474 | <i>12 months post-test</i>          |                                    |                                      |
|-----------------------------------------|------------------------------------------|-------------------------------------|-----------------------------------|--------------------------------------|-------------------------------------|-------------------------------------|------------------------------------|--------------------------------------|
|                                         | Initial-negatives (NN)<br>n =7,474       | Negative & infected (NP)<br>n=3,948 | Initial-positives (PN)<br>n=8,060 | Positive & re-infected (PP)<br>n=684 |                                     | Negative & infected (NP)<br>n=3,984 | Initial-positives (PN)<br>n= 8,060 | Positive & re-infected (PP)<br>n=684 |
| <b>Number of reported symptoms</b>      |                                          |                                     |                                   |                                      |                                     |                                     |                                    |                                      |
| 0 symptom                               | 6,731 (90.1%)                            | 2,570 (65.1%)                       | 5,037 (62.5%)                     | 382 (55.9%)                          | 3,740 (50.0%)                       | 1,281(32.5%)                        | 3,117 (38.7%)                      | 177 (25.9%)                          |
| 1 symptom                               | 70 (0.9%)                                | 63 (1.6%)                           | 249 (3.1%)                        | 28 (4.1%)                            | 1,357 (18.2%)                       | 748 (19.0%)                         | 1,444 (17.9%)                      | 130 (19.0%)                          |
| 2 symptoms                              | 93 (1.2%)                                | 92 (2.3%)                           | 300 (3.7%)                        | 19 (2.8%)                            | 756 (10.1%)                         | 525 (13.3%)                         | 962 (11.9%)                        | 79 (11.6%)                           |
| 3 symptoms                              | 110 (1.5%)                               | 131 (3.3%)                          | 341 (4.2%)                        | 28 (4.1%)                            | 507 (6.8%)                          | 356 (9.0%)                          | 720 (8.9%)                         | 67 (9.8%)                            |
| 4 symptoms                              | 84 (1.1%)                                | 151 (3.8%)                          | 359 (4.5%)                        | 26 (3.8%)                            | 351 (4.7%)                          | 259 (6.6%)                          | 530 (6.6%)                         | 67 (9.8%)                            |
| ≥5 symptoms                             | 386 (5.2%)                               | 941 (23.8%)                         | 1,774 (22.0%)                     | 201 (29.4%)                          | 763 (10.2%)                         | 779 (19.7%)                         | 1,287 (16.0%)                      | 164 (24.0%)                          |
| <b>Specific symptoms</b>                |                                          |                                     |                                   |                                      |                                     |                                     |                                    |                                      |
| Fever                                   | 311 (4.2%)                               | 729 (18.5%)                         | 1,468 (18.2%)                     | 146 (21.4%)                          | 151 (2.0%)                          | 109 (2.8%)                          | 168 (2.1%)                         | 38 (5.6%)                            |
| Chills                                  | 249 (3.3%)                               | 665 (16.8%)                         | 1,224 (15.2%)                     | 133 (19.4%)                          | 655 (8.8%)                          | 452 (11.5%)                         | 928 (11.5%)                        | 97 (14.2%)                           |
| Persistent cough                        | 361 (4.8%)                               | 730 (18.5%)                         | 1,205 (15.0%)                     | 145 (21.2%)                          | 438 (5.9%)                          | 348 (8.8%)                          | 499 (6.2%)                         | 80 (11.7%)                           |
| Tiredness                               | 363 (4.9%)                               | 893 (22.6%)                         | 1,821 (22.6%)                     | 186 (27.2%)                          | 2,383 (31.9%)                       | 1,756 (44.5%)                       | 3,388 (42.0%)                      | 369 (54.0%)                          |
| Shortness of breath                     | 147 (2.0%)                               | 424 (10.7%)                         | 820 (10.2%)                       | 89 (13.0%)                           | 956 (12.8%)                         | 991 (25.1%)                         | 1,787 (22.2%)                      | 197 (28.8%)                          |
| Loss of smell                           | 135 (1.8%)                               | 741 (18.8%)                         | 1,777 (22.0%)                     | 158 (23.1%)                          | 106 (1.4%)                          | 641 (16.2%)                         | 582 (7.2%)                         | 75 (11.0%)                           |
| Unusually hoarse voice                  | 161 (2.2%)                               | 268 (6.8%)                          | 368 (4.6%)                        | 50 (7.3%)                            | 168 (2.3%)                          | 132 (3.3%)                          | 143 (1.8%)                         | 29 (4.2%)                            |
| Unusual chest pain                      | 135 (1.8%)                               | 349 (8.8%)                          | 627 (7.8%)                        | 68 (9.9%)                            | 295 (4.0%)                          | 303 (7.7%)                          | 508 (6.3%)                         | 60 (8.8%)                            |
| Unusual abdominal pain                  | 82 (1.1%)                                | 178 (4.5%)                          | 284 (3.5%)                        | 46 (6.7%)                            | 188 (2.5%)                          | 157 (4.0%)                          | 333 (4.1%)                         | 40 (5.9%)                            |
| Diarrhoea                               | 87 (1.2%)                                | 196 (5.0%)                          | 340 (4.2%)                        | 42 (6.1%)                            | 127 (1.7%)                          | 96 (2.4%)                           | 194 (2.4%)                         | 19 (2.8%)                            |
| Headaches                               | 452 (6.1%)                               | 1,013 (25.7%)                       | 2,074 (25.7%)                     | 223 (32.6%)                          | 884 (11.8%)                         | 745 (18.9%)                         | 1,349 (16.7%)                      | 169 (24.7%)                          |
| Confusion, disorientation or drowsiness | 102 (1.4%)                               | 253 (6.4%)                          | 553 (6.9%)                        | 55 (8.0%)                            | 264 (3.5%)                          | 223 (5.7%)                          | 433 (5.4%)                         | 50 (7.3%)                            |

|                                    |                                          |                               |                             |                                |                               |                               |                              |                                |
|------------------------------------|------------------------------------------|-------------------------------|-----------------------------|--------------------------------|-------------------------------|-------------------------------|------------------------------|--------------------------------|
| Unusual eye-soreness               | 83 (1.1%)                                | 276 (7.0%)                    | 437 (5.4%)                  | 57 (8.3%)                      | 292 (3.9%)                    | 261 (6.6%)                    | 426 (5.3%)                   | 53 (7.8%)                      |
| Skipping meals                     | 169 (2.3%)                               | 489 (12.4%)                   | 888 (11.0%)                 | 93 (13.6%)                     | 526 (7.0%)                    | 420 (10.6%)                   | 737 (9.1%)                   | 78 (11.4%)                     |
| Dizziness or light-headedness      | 235 (3.1%)                               | 623 (15.8%)                   | 1,171 (14.5%)               | 126 (18.4%)                    | 573 (7.7%)                    | 491 (12.4%)                   | 973 (12.1%)                  | 134 (19.6%)                    |
| Sore throat                        | 533 (7.1%)                               | 985 (25.0%)                   | 1,743 (21.6%)               | 197 (28.8%)                    | 559 (7.5%)                    | 424 (10.7%)                   | 568 (7.1%)                   | 109 (15.9%)                    |
|                                    | <i>At time of index test<sup>b</sup></i> |                               |                             |                                |                               | <i>12 months post-test</i>    |                              |                                |
|                                    | Initial-negatives (n =7,474)             | Negative & infected (n=3,948) | Initial-positives (n=8,060) | Positive & re-infected (n=684) | Initial-negatives (n = 7,474) | Negative & infected (n=3,984) | Initial-positives (n= 8,060) | Positive & re-infected (n=684) |
| Unusual strong muscle pains        | 116 (1.6%)                               | 374 (9.5%)                    | 735 (9.1%)                  | 93 (13.6%)                     | 208 (2.8%)                    | 210 (5.3%)                    | 361 (4.5%)                   | 48 (7.0%)                      |
| Earache or ringing in ears         | 118 (1.6%)                               | 219 (5.6%)                    | 335 (4.2%)                  | 49 (7.2%)                      | 351 (4.7%)                    | 231 (5.9%)                    | 534 (6.6%)                   | 52 (7.6%)                      |
| Raised welts on skin or swelling   | 18 (0.2%)                                | 40 (1.0%)                     | 78 (1.0%)                   | 12 (1.8%)                      | 54 (0.7%)                     | 41 (1.0%)                     | 102 (1.3%)                   | 9 (1.3%)                       |
| Red/purple sores/blisters on feet  | 12 (0.2%)                                | 14 (0.4%)                     | 70 (0.9%)                   | 3 (0.4%)                       | 47 (0.6%)                     | 32 (0.8%)                     | 65 (0.8%)                    | 3 (0.4%)                       |
| Sleeping difficulties <sup>c</sup> | N/A                                      | N/A                           | N/A                         | N/A                            | 1,733 (23.2%)                 | 1,173 (29.7%)                 | 2,229 (27.7%)                | 242 (35.4%)                    |
| Other                              | 42 (0.6%)                                | 108 (2.7%)                    | 246 (3.1%)                  | 28 (4.1%)                      | 239 (3.2%)                    | 266 (6.7%)                    | 398 (4.9%)                   | 50 (7.3%)                      |
| Self-rated health <sup>a</sup>     | 90 (80, 100)                             | 90 (80, 95)                   | 90 (85,100)                 | 90 (85, 100)                   | 90 (80, 95)                   | 85 (75,95)                    | 90 (75, 95)                  | 85 (75,95)                     |

<sup>a</sup>Reported as median(IQR), scored on a scale of 0 (worst) to 100 (best).

<sup>b</sup>Retrospectively reported, see methods for details.

<sup>c</sup>Sleeping difficulties only included at 12 months post-test questionnaire.

**Supplementary Table S3.** Characteristics 12 months post index-test by SARS-CoV-2 status, stratified by PCC<sup>a</sup> at 12 months (Mean (SD)).

|                                        | SARS-CoV-2<br>Test Negatives (NN)<br>N=7,474            |                                                  | SARS-CoV-2<br>Test Positives (PN)<br>N=8,060            |                                                  |
|----------------------------------------|---------------------------------------------------------|--------------------------------------------------|---------------------------------------------------------|--------------------------------------------------|
|                                        | Not meeting PCC definition at<br>12 months<br>(n=5,951) | Meeting PCC definition at<br>12 months (n=1,523) | Not meeting PCC definition<br>at 12 months<br>(n=5,917) | Meeting PCC definition at 12<br>months (n=2,143) |
| <b>Prevalence</b>                      |                                                         | 20.4%                                            |                                                         | 26.6%                                            |
| <b>SDQ<sup>b</sup></b>                 |                                                         |                                                  |                                                         |                                                  |
| Total Difficulties                     | 10.0 (5.7)                                              | 16.8(6.0)                                        | 9.5 (5.5)                                               | 16.0 (6.2)                                       |
| Emotional symptoms                     | 3.1 (2.3)                                               | 5.8 (2.4)                                        | 2.9 (2.3)                                               | 5.7 (2.5)                                        |
| Conduct problems                       | 1.4 (1.4)                                               | 2.3 (1.8)                                        | 1.4 (1.4)                                               | 2.1 (1.8)                                        |
| Hyperactivity/inattention              | 3.6 (2.5)                                               | 5.5 (2.5)                                        | 3.5 (2.4)                                               | 5.3 (2.6)                                        |
| Peer relationship<br>problem           | 1.9 (1.7)                                               | 3.1 (2.0)                                        | 1.8 (1.6)                                               | 2.9 (2.0)                                        |
| <b>SWEMWBS</b>                         | 21.9 (4.1)                                              | 18.6 (3.3)                                       | 22.2 (4.1)                                              | 19.2 (3.6)                                       |
| <b>Chalder fatigue scale</b>           | 11.9 (4.3)                                              | 17.7 (5.7)                                       | 12.2 (4.2)                                              | 18.0 (5.6)                                       |
| <b>Self-rated health<sup>b,c</sup></b> | 90 (80,100)                                             | 75<br>(60,85)                                    | 90 (85, 95)                                             | 75<br>(60,85)                                    |
| <b>Symptom severity<sup>d</sup></b>    | 50 (20,60)                                              | 60 (30,80)                                       | 50 (30,70)                                              | 50 (40,70)                                       |
| <b>Symptom impact<sup>e</sup></b>      | 30 (10,60)                                              | 60 (30,80)                                       | 30 (10,60)                                              | 50 (20,70)                                       |

Note. SDQ = Strengths and Difficulties Questionnaire; SWEMWBS = Short Warwick-Edinburgh Mental Wellbeing Scale.

A higher SDQ score indicates more problems; a higher SWEMWBS score indicates better mental well-being; a higher fatigue score is more severe.

<sup>a</sup>Using data from the questionnaire on symptoms and the EQ-5D-Y scale at the time of the questionnaire (i.e., approximately 12-months after the index PCR-test), PCC was operationalized as having at least 1 symptom and experiencing some/a lot of problems with respect to mobility, self-care, doing usual activities or having pain/discomfort or feeling very worried/sad. For test-negatives we excluded the need for a positive PCR test. We cannot state with certainty when during the 12-month period the subsequent infections occurred (some of this information was based on self-report), therefore we did not operationalise the PCC research definition for the NP or PP groups. Number of symptoms and the EQ-5D-Y scale at 12 months not shown in this table as they are part of the definition of PCC.

<sup>b</sup>Missing data for SDQ (n=1 who tested positive); missing data for Self-rated health (n=2 ; 1 tested positive and 1 tested negative).

<sup>c</sup>reported as median(IQR), scored on a scale of 0 (worst) to 100 (best).

<sup>d</sup>Symptom severity sub-sample N=621, scale is 0 (not severe at all) to 100 (extremely severe).

<sup>e</sup>Symptom impact sub-sample N=618, a scale is 0 (no impact) to 100 (extreme impact).

**Supplementary Table S4.** Characteristics of CYP 12 months post index-test by SARS-CoV-2 and vaccination status at 12 months (N(%) or Mean(SD)).

|                                             | Initial test-negatives (NN)<br>N=7,463 |                           | Negative & infected (NP)<br>N=3,938 |                              | Initial test-positives (PN)<br>N=8,043 |                              | Positive-reinfected (PP)<br>N=684 |                            |
|---------------------------------------------|----------------------------------------|---------------------------|-------------------------------------|------------------------------|----------------------------------------|------------------------------|-----------------------------------|----------------------------|
|                                             | Vaccine: No<br>(n=1,536)               | Vaccine: Yes<br>(n=5,927) | Vaccine:<br>No<br>(n=1,310)         | Vaccine:<br>Yes<br>(n=2,628) | Vaccine:<br>No<br>(n=1,931)            | Vaccine:<br>Yes<br>(n=6,112) | Vaccine:<br>No<br>(n=258)         | Vaccine:<br>Yes<br>(n=426) |
| <b>Number of symptoms</b>                   |                                        |                           |                                     |                              |                                        |                              |                                   |                            |
| 0 symptoms                                  | 740 (48.2%)                            | 2,993<br>(50.5%)          | 405 (30.9%)                         | 874 (33.3%)                  | 709 (36.7%)                            | 2,400<br>(39.3%)             | 64 (24.8%)                        | 113<br>(26.5%)             |
| 1 symptom                                   | 261 (17.0%)                            | 1,095<br>(18.5%)          | 260 (19.8%)                         | 487 (18.5%)                  | 331 (17.1%)                            | 1,111<br>(18.2%)             | 52 (20.2%)                        | 78 (18.3%)                 |
| 2 symptoms                                  | 153 (10.0%)                            | 602 (10.1%)               | 165 (12.6%)                         | 358 (13.6%)                  | 239 (12.4%)                            | 722 (11.8%)                  | 26 (10.1%)                        | 53 (12.4%)                 |
| 3 symptoms                                  | 104 (6.8%)                             | 402 (6.7%)                | 116 (8.8%)                          | 239 (9.1%)                   | 190 (9.8%)                             | 529 (8.7%)                   | 30 (11.6%)                        | 37 (8.7%)                  |
| 4 symptoms                                  | 79 (5.1%)                              | 272 (4.6%)                | 92 (7.0%)                           | 167 (6.4%)                   | 130 (6.7%)                             | 400 (6.5%)                   | 25 (9.7%)                         | 42 (9.8%)                  |
| ≥5 symptoms                                 | 199 (12.9%)                            | 563 (9.5%)                | 272 (20.8%)                         | 503 (19.1%)                  | 332 (17.2%)                            | 950 (15.5%)                  | 61 (23.6%)                        | 103<br>(24.2%)             |
| <b>EQ5DY</b>                                |                                        |                           |                                     |                              |                                        |                              |                                   |                            |
| Some/lots of mobility problems              | 97 (6.3%)                              | 304 (5.1%)                | 94 (7.2%)                           | 163 (6.2%)                   | 136 (7.0%)                             | 353 (5.8%)                   | 17 (6.6%)                         | 41 (9.6%)                  |
| Some/lots of self-care problems             | 94 (6.1%)                              | 280 (4.7%)                | 54 (4.1%)                           | 116 (4.4%)                   | 75 (3.9%)                              | 242 (4.0%)                   | 14 (5.4%)                         | 27 (6.3%)                  |
| Some/lots of problems with usual activities | 239 (15.6%)                            | 757 (12.8%)               | 267 (20.4%)                         | 471 (17.9%)                  | 352 (18.2%)                            | 911 (14.9%)                  | 53 (20.5%)                        | 86 (20.2%)                 |
| Some/lots of pain discomfort                | 262 (17.1%)                            | 879 (14.8%)               | 307 (23.4%)                         | 524 (19.9%)                  | 405 (21.0%)                            | 1,067<br>(17.5%)             | 58 (22.5%)                        | 102<br>(23.9%)             |
| Very worried, sad/unhappy                   | 107 (7.0%)                             | 496 (8.4%)                | 101 (7.7%)                          | 239 (9.1%)                   | 165(8.5%)                              | 542 (8.9%)                   | 19 (7.4%)                         | 46 (10.8%)                 |
| <b>SDQ<sup>a</sup></b>                      |                                        |                           |                                     |                              |                                        |                              |                                   |                            |
| Total Difficulties                          | 11.2 (6.7)                             | 11.5 (6.3)                | 11.3 (6.6)                          | 11.4 (6.4)                   | 11.3 (6.7)                             | 11.3 (6.3)                   | 11.2 (6.7)                        | 11.7 (6.3)                 |
| Emotional symptoms                          | 3.3 (2.6)                              | 3.7 (2.6)                 | 3.6 (2.6)                           | 3.7 (2.7)                    | 3.5 (2.6)                              | 3.7 (2.6)                    | 3.4 (2.5)                         | 3.9 (2.7)                  |
| Conduct problems                            | 1.8 (1.7)                              | 1.6 (1.5)                 | 1.7 (1.7)                           | 1.6 (1.6)                    | 1.7 (1.6)                              | 1.5 (1.5)                    | 1.8 (1.8)                         | 1.6 (1.6)                  |
| Hyperactivity/inattention                   | 3.9 (2.7)                              | 4.0 (2.6)                 | 4.0 (2.7)                           | 4.1 (2.6)                    | 3.9 (2.6)                              | 4.0 (2.6)                    | 3.8 (2.6)                         | 4.2 (2.6)                  |

|                                      |                                  |            |                                  |             |                                     |            |                                |            |
|--------------------------------------|----------------------------------|------------|----------------------------------|-------------|-------------------------------------|------------|--------------------------------|------------|
| Peer relationship problem            | 2.1 (1.8)                        | 2.2 (1.9)  | 1.9 (1.8)                        | 2.0 (1.8)   | 2.1 (1.8)                           | 2.0 (1.8)  | 2.0 (2.1)                      | 2.0 (1.8)  |
|                                      | Initial test-negatives (N=7,463) |            | Negative & infected<br>(N=3,938) |             | Initial test-positives<br>(N=8,043) |            | Positive-reinfected<br>(N=684) |            |
| <b>SWEMBS</b>                        | 21.5 (4.4)                       | 21.2 (4.1) | 21.5 (4.4)                       | 21.3 (4.2)  | 21.6 (4.5)                          | 21.4 (4.1) | 21.6 (4.6)                     | 20.8 (4.0) |
| <b>Chalder fatigue scale</b>         | 12.6 (5.8)                       | 13.2 (5.0) | 13.5 (5.3)                       | 14.1 (5.2)  | 13.6 (5.5)                          | 13.8 (5.2) | 13.8 (5.5)                     | 14.6 (5.4) |
| <b>Self-rated health<sup>b</sup></b> | 90 (80,100)                      | 90 (80,95) | 85 (75,95)                       | 85 (75, 95) | 90 (75,95)                          | 90 (75,95) | 85 (75,95)                     | 85 (70,95) |
| <b>Symptom severity<sup>c</sup></b>  | 50 (30,70)                       | 50 (30,70) | 50 (40,70)                       | 50 (30,70)  | 60 (30,70)                          | 50 (30,60) | 40 (20,70)                     | 50 (30,60) |
| <b>Symptom impact<sup>d</sup></b>    | 30 (0,60)                        | 50 (20,70) | 50 (20,70)                       | 50 (20,70)  | 50 (10,80)                          | 40 (10,60) | 50 (10,80)                     | 40 (10,65) |

Note: Those who did not respond to the vaccine question (n=38) were excluded.

<sup>a</sup>Missing data for SDQ (n=1 in 'initial-positives').

<sup>b</sup>Reported as median(IQR), scored on a scale of 0 (worst) to 100 (best); missing data for Self-rated health (n=2 ; 1 in "initial-positives" and 1 in "initial-negatives").

<sup>c</sup>Symptom severity sub-sample N=621, scale is 0 (not severe at all) to 100 (extremely severe).

<sup>d</sup>Symptom impact sub-sample N=618, a scale is 0 (no impact) to 100 (extreme impact).
